# Supplementary material for: Development and psychometric properties of the parent version of the Profile of Neuropsychiatric Symptoms (PONS) in children and adolescents
Source: PubMed Central journal article supplement (PMC4443664; doi:10.1186/s12887-015-0376-x), 2015-05-19
Supplement: 12887_2015_376_MOESM1_ESM.pdf [file 12887_2015_376_MOESM1_ESM.pdf]

## APPENDIX 1

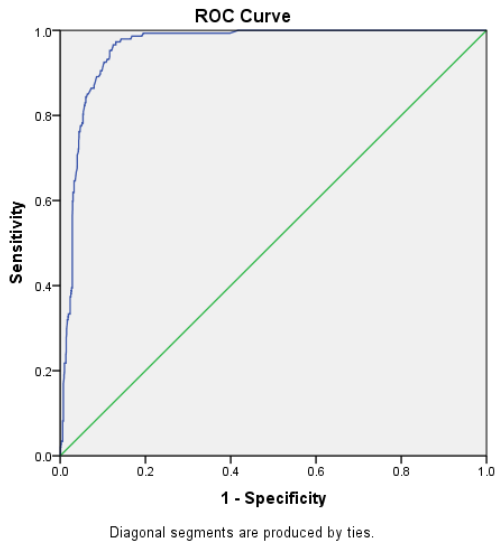

**Figure 1:** ROC Curve of PONS Total Score

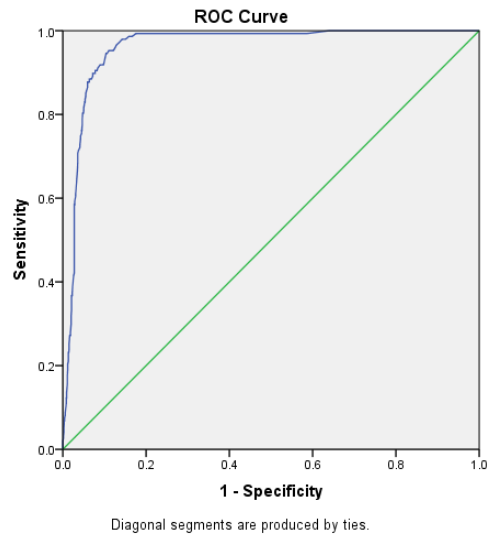

**Figure 2:** ROC Curve of Factor 1 (Neurodevelopmental Disability) Score

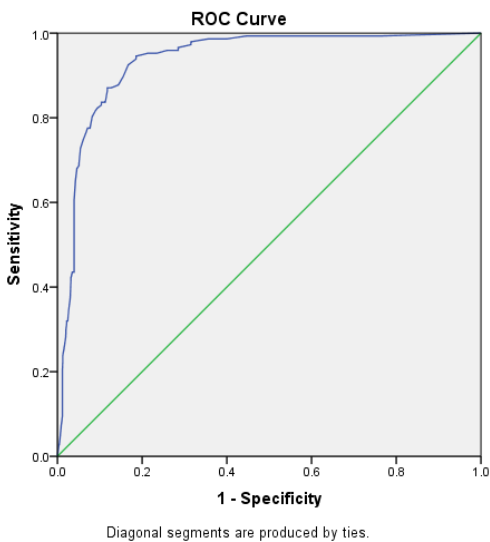

**Figure 3:** ROC Curve of Factor 2 (Behavioural and Emotional Dysregulation) Score

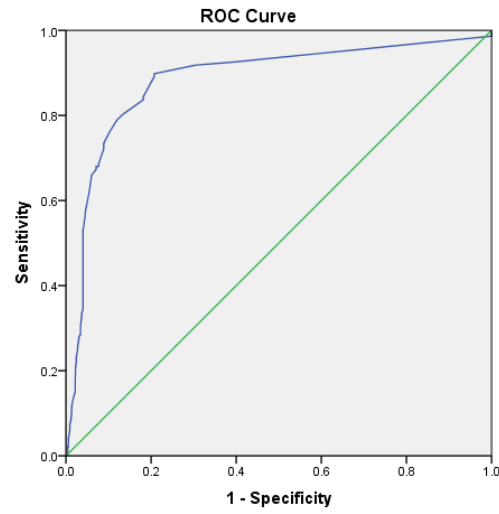

**Figure 4:** ROC Curve of Factor 3 (Psychoses and Personality Dysfunction) Score

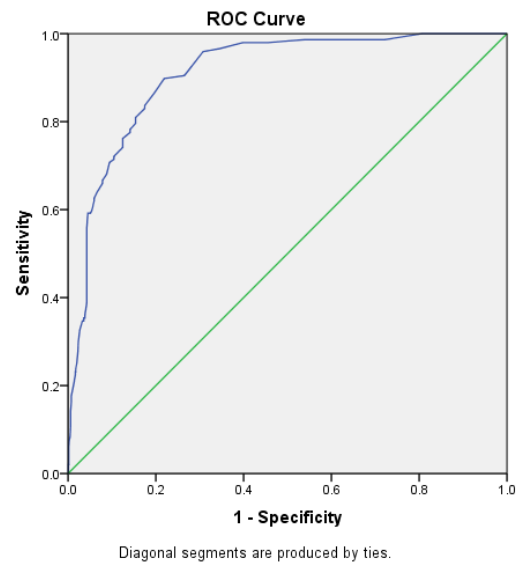

**Figure 5:** ROC Curve of Factor 4 (Anxiety and Depression) Score
